# Supplementary material
Source: PubMed Central journal article supplement (PMC3230481)
Supplement: cbt1203_0169SD1.pdf [file cbt1203_0169SD1.pdf]

## Supplemental Materials

### Luminex Serum Assays

Bead-based immunoassays for TNFRSF21/DR6, ESM1/endocan and CSPG2/versican were developed towards each protein using capture antibodies coupled to COOH-coated fluorescent beads by using an amine coupling kit from BioRad (Hercules, CA) following manufacturer's protocol. 7.5  $\mu\text{g}$  of antibody were used per  $1 \times 10^6$  beads in each reaction. Luminex assays for all three proteins were performed in serum samples, each requiring a dilution prior to the assay. Serum was diluted 7.5, 10, and 20-fold in assay buffer (1% BSA, 0.1% Tween 20, PBS (pH 7.4)) to measure TNFRSF21/DR6, ESM1/endocan and CSPG2/versican, respectively. For each assay, wells of a 96-well filter plate (Millipore, Billerica, MA) were prewet with assay buffer (100  $\mu\text{L}$ ) for 5 min. Coupled beads (2500 beads/well) for each assay were added to the filter plate and washed once with 100  $\mu\text{L}$  of assay buffer. Diluted serum samples (50  $\mu\text{L}$ ) were added to each well and incubated at room temperature for 2 h followed by overnight incubation at 4°C. All incubation steps were performed with shaking at 300-400 rpm on a microplate shaker. In addition to serum samples, each plate contained a 2-fold serial dilution of purified protein standards, six control samples, and two blank wells containing only assay buffer. Following overnight incubation, plates were allowed to reach room temperature for 1 h and the wells were then washed with 100  $\mu\text{L}$  of assay buffer 3 times. Biotinylated detection antibody (25  $\mu\text{L}$ /well) was added and incubated at room temperature for 2 h. Wells were washed with 100  $\mu\text{L}$  of assay buffer 3 times and phycoerythrin-conjugated streptavidin (SAPE) (50  $\mu\text{L}$ /well) was added and incubated at room temperature for 1 h. Wells were washed as before and beads were suspended in 125  $\mu\text{L}$  of assay buffer. The level of each protein in the samples was measured by reading the beads using the BioPlex 200 Luminex instrument (BioRad) (100 beads per sample). Bead-based immunoassays for CA125 were performed using the Widescreen Human Cancer Panel 1 kit (Novagen, Gibbstown, NJ) following the manufacturer's protocol.

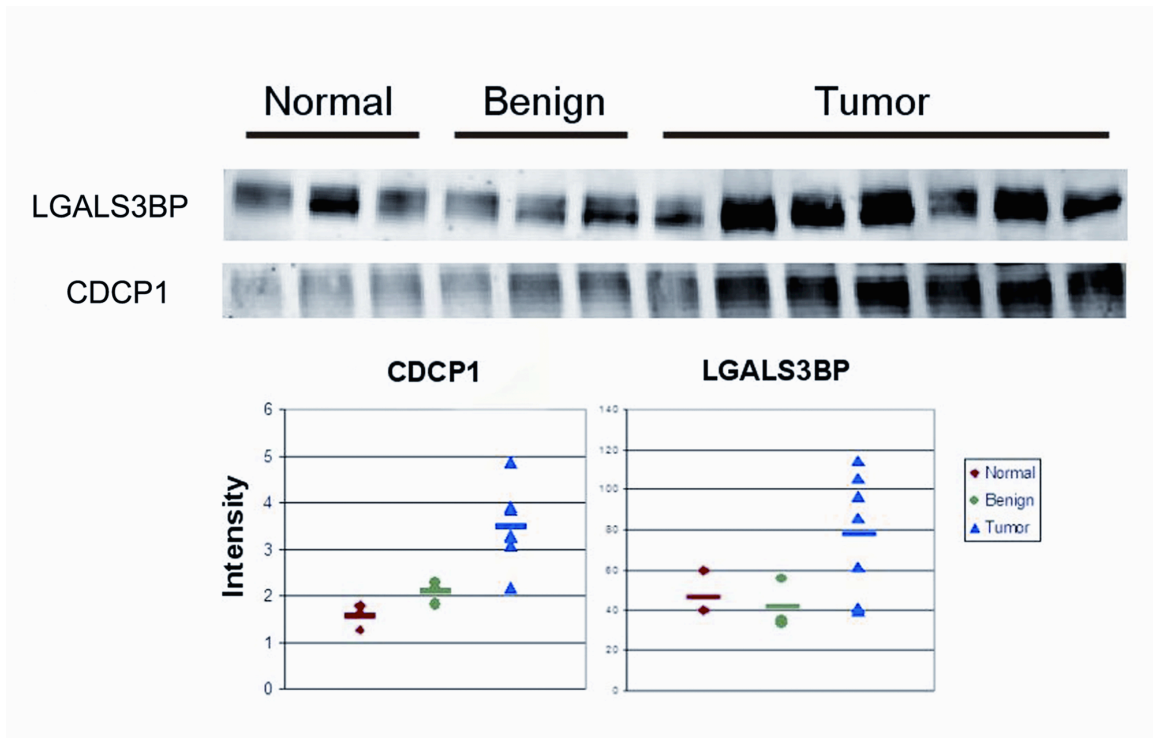

**Supplemental Figure S1. CDCP1-LGALS3BP in EOC patients' sera.**

TVM concentration in the serum of EOC patients. Western blot of CDCP1 and LGALS3BP protein in control normal and benign human sera and sera from ovarian cancer patients.

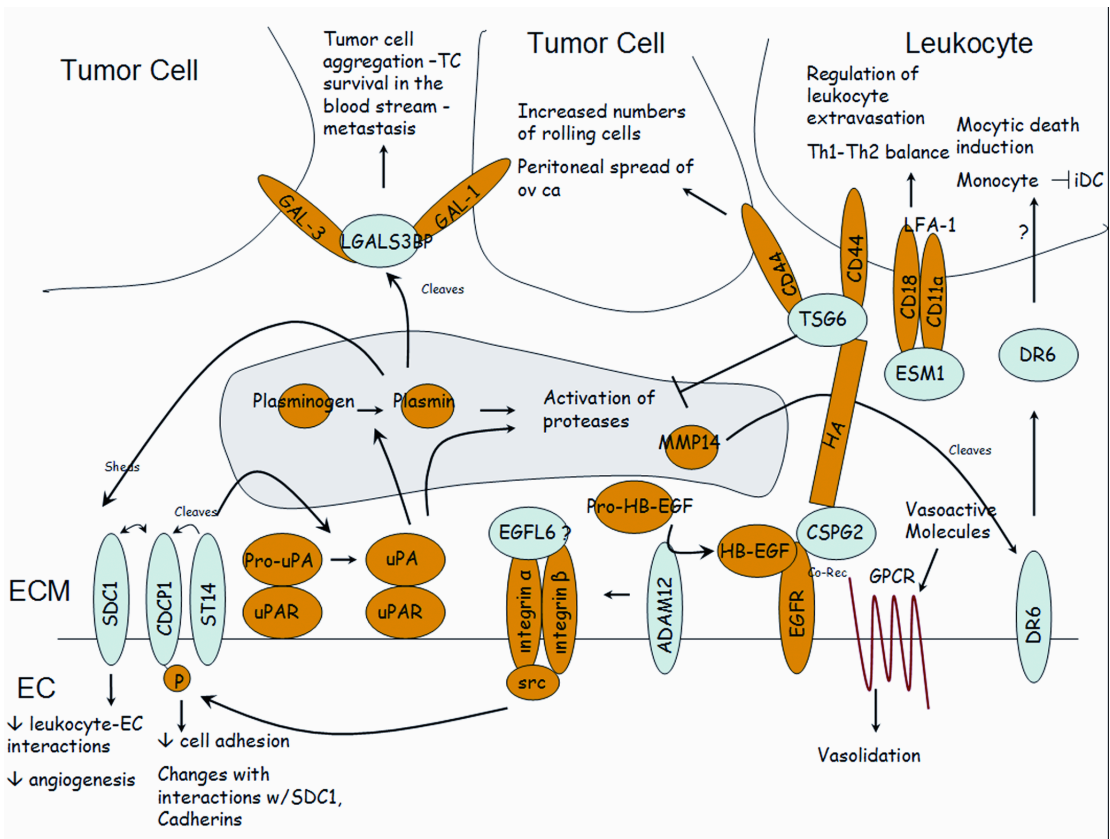

**Supplemental Figure S2. TVM functions.**

Molecular pathways of tumor vascular markers. Schematic representation of the known pathways where the newly identified TVMs (light blue) are involved.

|    | <b>Membrane</b>    |                      | <b>Secreted</b>    |                      | <b>Intracellular</b> |                      |
|----|--------------------|----------------------|--------------------|----------------------|----------------------|----------------------|
|    | <b>Common Name</b> | <b>Affymetrix id</b> | <b>Common Name</b> | <b>Affymetrix id</b> | <b>Common Name</b>   | <b>Affymetrix id</b> |
| 1  | ACTR3              | 213102_at            | APCDD1             | 225016_at            | ANKFY1               | 231308_at            |
| 2  | ADAM12             | 213790_at            | BECN1              | 208945_s_at          | ARL10C               | 222442_s_at          |
| 3  | AKAP8              | 203847_s_at          | C6orf37            | 224973_at            | C7orf3               | 227161_at            |
| 4  | ANKRD9             | 227959_at            | C6orf69            | 228299_at            | CA13                 | 231270_at            |
| 5  | ARHGAP18           | 225171_at            | C9orf113           | 229976_at            | CARD11               | 223514_at            |
| 6  | BCAP29             | 230150_at            | CCL15              | 210390_s_at          | CDKN2B               | 236313_at            |
| 7  | BDKRB2             | 205870_at            | COL11A1            | 37892_at             | CDS1                 | 205709_s_at          |
| 8  | C10orf69           | 202444_s_at          | COL15A1            | 203477_at            | CENTA2               | 219358_s_at          |
| 9  | C11orf5            | 219050_s_at          | COL22A1            | 228873_at            | CHD3                 | 208807_s_at          |
| 10 | C14orf100          | 223215_s_at          | COL22A1            | 228873_at            | CHP                  | 214665_s_at          |
| 11 | C14orf28           | 238647_at            | CSPG2              | 221731_x_at          | COL11A1              | 37892_at             |
| 12 | C1orf10            | 220090_at            | DEFB1              | 210397_at            | CSTF2                | 238821_at            |
| 13 | C2orf6             | 201297_s_at          | DKFZp761H079       | 228201_at            | CTSB                 | 213275_x_at          |
| 14 | C6orf55            | 224437_s_at          | DKFZp762E1312      | 218726_at            | CYFIP2               | 220999_s_at          |
| 15 | CALM3              | 200622_x_at          | ESM1               | 208394_x_at          | DJ467N11.1           | 231269_at            |
| 16 | CD24               | 209771_x_at          | FJX1               | 219522_at            | DLX6                 | 242940_x_at          |
| 17 | CDCP1              | 218451_at            | FLJ11526           | 222831_at            | EBF2                 | 244885_at            |
| 18 | CDH1               | 201131_s_at          | FLJ12748           | 242838_at            | EHF                  | 219850_s_at          |
| 19 | CDS1               | 226185_at            | FLJ20171           | 225846_at            | EIF2AK4              | 225164_s_at          |
| 20 | CHODL              | 219867_at            | FLJ22795           | 223327_x_at          | EIF2AK4              | 225164_s_at          |
| 21 | CKLFSF6            | 223047_at            | FLJ22875           | 224779_s_at          | ERBB2IP              | 222473_s_at          |
| 22 | CLDN1              | 222549_at            | FLJ30277           | 230572_at            | ERP70                | 208658_at            |
| 23 | CLST11240          | 219719_at            | FLJ35801           | 228449_at            | FBXO32               | 225345_s_at          |
| 24 | CNTN6              | 207195_at            | FLJ46072           | 226129_at            | FKSG44               | 227964_at            |
| 25 | CST5               | 207925_at            | FLT1               | 226497_s_at          | FLJ10055             | 230856_at            |
|    | DKFZp564I          |                      |                    |                      |                      |                      |
| 26 | 922                | 209596_at            | GPT2               | 224839_s_at          | FLJ20171             | 225846_at            |
| 27 | DSG2               | 217901_at            | HAPLN1             | 230895_at            | FRG1                 | 235535_x_at          |
| 28 | EGFL6              | 219454_at            | HES2               | 231928_at            | GSR                  | 225609_at            |
| 29 | EPSTI1             | 227609_at            | IBSP               | 236028_at            | HEMGN                | 223670_s_at          |
| 30 | ERBB3              | 226213_at            | IVNS1ABP           | 201363_s_at          | HES2                 | 231928_at            |
| 31 | F2RL1              | 206429_at            | KIAA0930           | 227144_at            | HIST1H2BM            | 208515_at            |
| 32 | F3                 | 204363_at            | KIAA1892           | 224789_at            | HOXB2                | 205453_at            |
| 33 | FAD104             | 243830_at            | KIAA1909           | 236255_at            | IRS1                 | 235392_at            |
| 34 | FLJ10826           | 225110_at            | KIAA2022           | 234333_at            | LACTB2               | 222714_s_at          |
| 35 | FNDC3              | 215910_s_at          | KIBRA              | 213085_s_at          | LARS2                | 34764_at             |
| 36 | FOLH1              | 205860_x_at          | LGALS3BP           | 200923_at            | LASP1                | 200618_at            |
| 37 | FRAP1              | 202288_at            | LOC130355          | 227840_at            | LZTFL1               | 222632_s_at          |

|    |           |             |           |             |          |             |
|----|-----------|-------------|-----------|-------------|----------|-------------|
| 38 | FZD10     | 219764_at   | LOC132671 | 229331_at   | LZTS1    | 47550_at    |
| 39 | GPM6B     | 209170_s_at | LOC150271 | 228658_at   | MCM4     | 222036_s_at |
| 40 | GPR105    | 206637_at   | LOC158135 | 242545_at   | MGC20410 | 228439_at   |
| 41 | GRM1      | 210939_s_at | LOC158563 | 226273_at   | MGC2408  | 227103_s_at |
| 42 | HIATL2    | 224078_at   | LOC254531 | 239608_at   | MNT      | 212952_at   |
| 43 | IGSF4     | 209031_at   | LOC283713 | 230783_at   | MPHOSPH9 | 206205_at   |
| 44 | IL10RA    | 204912_at   | LOC284801 | 237670_at   | NCF4     | 205147_x_at |
| 45 | IL28RA    | 244261_at   | LOC286334 | 226590_at   | NEUROG3  | 207965_at   |
| 46 | IL7R      | 226218_at   | LOC401022 | 230935_at   | NID2     | 204114_at   |
| 47 | INSR      | 227432_s_at | LTBP2     | 204682_at   | OR7E47P  | 217499_x_at |
| 48 | KCNE3     | 227647_at   | MGC3032   | 218641_at   | OSBPL3   | 209626_s_at |
| 49 | KCNE4     | 222379_at   | MUC3A     | 214676_x_at | PDE7A    | 232314_at   |
| 50 | KCNK5     | 219615_s_at | NAV1      | 224774_s_at | PLCE1    | 205111_s_at |
| 51 | KIAA0703  | 206043_s_at | OR7E47P   | 217499_x_at | PNPT1    | 225291_at   |
| 52 | KIAA1024  | 215081_at   | PHLDB1    | 216102_at   | PRDM1    | 228964_at   |
| 53 | KIAA1906  | 236824_at   | PLA2G2D   | 228863_at   | RAPH1    | 225186_at   |
| 54 | LOC116238 | 227804_at   | PSAT1     | 223062_s_at | RGS14    | 204280_at   |
| 55 | LOC51136  | 227268_at   | RGC32     | 218723_s_at | RPS6KA1  | 203379_at   |
| 56 | LPPR4     | 213496_at   | RP2       | 205191_at   | RUNX1    | 209360_s_at |
| 57 | MEST      | 202016_at   | SIPA1L2   | 225056_at   | SCO2     | 205241_at   |
| 58 | MGC34647  | 237046_x_at | SIPA1L3   | 213600_at   | SEC10L1  | 228418_at   |
| 59 | MME       | 203434_s_at | SLIT2     | 228850_s_at | SHOC2    | 202777_at   |
| 60 | MS4A6A    | 219666_at   | SPP1      | 209875_s_at | SOX11    | 204915_s_at |
| 61 | MUC1      | 213693_s_at | STC2      | 203439_s_at | SPRY1    | 230212_at   |
| 62 | MUC16     | 220196_at   | TNFAIP6   | 206026_s_at | STC2     | 203439_s_at |
| 63 | MUC3A     | 214676_x_at | UBPH      | 224878_at   | STCH     | 202557_at   |
| 64 | OLFML2B   | 213125_at   | WFDC2     | 203892_at   | STXBP4   | 237706_at   |
| 65 | OPN3      | 224392_s_at |           |             | TARS     | 201263_at   |
| 66 | PCDH17    | 205656_at   |           |             | TBX2     | 213417_at   |
| 67 | PCDHB2    | 231725_at   |           |             | UPP1     | 203234_at   |
| 68 | PLXDC1    | 214081_at   |           |             | VAR2L    | 226200_at   |
| 69 | POLYDOM   | 213247_at   |           |             | WASF2    | 224563_at   |
| 70 | PREX1     | 224909_s_at |           |             | WASPIP   | 202664_at   |
| 71 | SCGB2A1   | 205979_at   |           |             | ZNF311   | 236551_at   |
| 72 | SCNN1A    | 203453_at   |           |             |          |             |
| 73 | SDC1      | 201286_at   |           |             |          |             |
| 74 | SEC23B    | 210293_s_at |           |             |          |             |
| 75 | SGPP2     | 226560_at   |           |             |          |             |
| 76 | SLAMF8    | 219386_s_at |           |             |          |             |
| 77 | SLC11A1   | 210422_x_at |           |             |          |             |
| 78 | SLC30A5   | 243166_at   |           |             |          |             |
| 79 | SLC30A6   | 243643_x_at |           |             |          |             |
| 80 | SLC5A4    | 215960_at   |           |             |          |             |

|    |          |             |
|----|----------|-------------|
| 81 | SLC9A5   | 220650_s_at |
| 82 | SLCO3A1  | 210542_s_at |
| 83 | SLIT2    | 228850_s_at |
| 84 | SPRY4    | 221489_s_at |
| 85 | SPTB     | 229952_at   |
| 86 | ST14     | 216905_s_at |
| 87 | TACSTD1  | 201839_s_at |
| 88 | TAP1     | 202307_s_at |
| 89 | THY1     | 213869_x_at |
| 90 | TMEM19   | 229126_at   |
| 91 | TMEM2    | 218113_at   |
| 92 | TMEM8    | 222718_at   |
| 93 | TNFAIP1  | 201208_s_at |
| 94 | TNFRSF21 | 218856_at   |
| 95 | TOMM22   | 217960_s_at |
| 96 | TRIO     | 216700_at   |
| 97 | TUBAL3   | 220310_at   |
| 98 | WARP     | 222723_at   |

**Supplemental Table S1.**

Transmembrane and Secreted genes upregulated by the ovarian tumor endothelium.

|              | <b>LEFT PRIMER</b>      | <b>RIGHT PRIMER</b>     |
|--------------|-------------------------|-------------------------|
| ACTR3        | GGATCTATGCTGGCTTCCAC    | CCAAACACTGGATTGTGACG    |
| ADAM12 LONG  | TGTGACAAGTTTGGCTTTGG    | GACACAGGATGGTCACCAGA    |
| ADAM12 SHORT | GCTTTGGAGGAAGCACAGAC    | AGTGTCAGTGAGGCAGTAGACG  |
| AI057121     | CATGCAACATGGGTGTTAATTC  | CCCTGTTGAGCAACCTGAAG    |
| AW517716     | TGATCTTGGCTCACTGCAAC    | TGGTGAAACCCCGTCTCTAC    |
| BLAME        | ATGCTGGTACTCTCTTCTCTGC  | AGGGGGTCTCTGTCTCTGG     |
| BM-009       | CAACCTCCTAATAGTGTGGAAGG | CAGAATTGTTATTGCAGCATGG  |
| BNG          | CCCAGACCTCAAGTCTCTC     | AGAGGCTGATGCCGTTGTAG    |
| C11ORF8      | CTTCAAAGAGTGGGCTGTGTG   | GAGGCATTGATGTACGTTGTG   |
| C6ORF55      | AGCAGAAGTGCCTCACAGC     | CTGGGGTTAGACGAACATCC    |
| CD31         | TTTGGCTAGTCTTGTCTTTGG   | CGGTGTCTTCAGGTTGGTATTC  |
| CDCP1 LONG   | GGCTGCAGTTCCAAGTTTTG    | CTCGATGGTGAGTGACATGG    |
| CDCP1 SHORT  | GGCTGCAGTTCCAAGTTTTG    | TACCCAGGAAAACAACGAAGG   |
| CMKOR1       | GTCCAGTGACCAGGAGAAGC    | AGGGATGTAGTGCAGGATGG    |
| CSPG2        | CAAGCATCTGTCTCACGAA     | CAACGGAAAGTCATGCTCAA    |
| DEFB1        | TCCCCAGTTCCTGAAAATCC    | CAAGGCCTGTGAGAAAAGTTACC |
| EGFL6        | AGAAGACCACGAGTGAGGATG   | CCACGTTCTGCTCAAAAATG    |
| EPB41L3      | ACCACCAGTACCACCACCAC    | CATGGTCAATGTCTGCATCC    |
| EPST11 LONG  | CTGAACACAGAATCGCCAGA    | TCCCTAGGCAGGATAGGAAGT   |
| EPST11 SHORT | CTGAACACAGAATCGCCAGA    | TTGTTTCATCTTCATCTTTTGC  |
| ESM1         | CCTGAAATTCCTTCTTCC      | GGCAGCATCTCTTTCACAAC    |
| EVA1         | GTCTCTTCCAGCATTACCG     | TTTTCTCTGGTTGAGCCTTTC   |
| FJX1         | ACTACCTGACGGCCAACTTC    | CGCCTCATGTCCAGAAAG      |
| FLJ13910     | TTTCTCAGCAGGTTGTGTGG    | TTACCAAGGTCCACTTCAATAGG |
| FLJ23594     | ACAACCGAGTGGATCAAAATG   | AGAGACCTCTGGAGCTTACGG   |
| FLJ46072     | AAGTTCCTGCTGGTGGACTG    | ACCAGCTCTCCTTGGAACAC    |
| FNDC3A       | GCCAATGAAAGGTGATCCAG    | TGGAATACCGGAAGGAAGAG    |
| FZD10        | CAGACTAAAACGCTGGACTGC   | TCTTGGAGGTCCAAATCCAC    |
| GPM6B        | TCCTATCACCTGTTCAATTGTGG | GCAGCAATCTTCCCGACTC     |
| GPR105       | ATCAGCAACTTCCCCTGTTT    | AAATGGTCTCCTTCCCATTC    |
| GPR65        | AAATCTGCACTGGGAGGTG     | TCCCTTCAAACATCCTTGG     |
| HAPLN1       | AGTCAGGAACTACGGATTTTGG  | GCACCGCTTCATCATAGGTC    |
| HE4          | GTGTCCTGGCCAGATGAAAT    | AGGGCCAGGCAGAAACTT      |
| HOXA9        | AGGCGCCTTCTCTGAAAAC     | GGGTCTGGTGTTTTGTATAGGG  |
| KIBRA        | CACCATCATCCGCTCTAAGAC   | ACAAAAGGTGGCTTTTGGAC    |
| LGALS3BP     | GTACCATGAGTGTGGATGC     | GTGGAAGCACTTGACTGACG    |
| LTBP2        | TGACTGTTTTGAGGGCTTCC    | ATGGACACAGACACAGCAG     |
| LZTS1        | AGGGAGAAGACCAGCTTCG     | AGGATCTCGCTAGCCTTGG     |
| OLFML2B      | CCAAGGATGAGCGGATTTAC    | GCTGTACGGGAGCTTGTAGG    |
| PCDH17       | GGACTAATGCAAGCGAGACC    | CTGGGTCTTAAACGTGGAG     |
| PSMAL        | GCTTCCAAGTTCAGCGAGAG    | GGTCTGTCTGGTAACCTAATGG  |
| SCGB2A1      | ATGGGGAAATTCAAGCAGTG    | CCAAACGCCTTGGGTAAAG     |
| SCL11A1      | TTTGTCTAGGCTGTCTTTGG    | GGAAGATCTTGGCGTAGTCCG   |
| SDC1         | TCCTGGACAGGAAAGAGGTG    | CAAGGAGTAGCTGCCTTCGT    |
| SEC23B       | GAACAGCTGCAAAATGGTCAC   | AATCTCCCATTACCATGTAGCC  |
| SLC30A6      | TTGGACAAACTCATCAGAGAGG  | CTCGTCGAATCTTACATGCAC   |
| SPP1         | ACATATGATGGCCGAGGTG     | TGAGGTGATGTCCTCGTCTG    |
| ST14         | GGGACACACCCAGTATGGAG    | GAAGCCCACGCACATCAT      |
| TNFAIP1      | CGGAGAAGAAGCAGACCAAG    | GCCTCCAACAAGGAGTTGTC    |
| TNFAIP6      | CGCAACTTACAAGCAGCTAGAG  | TAATGCCAGTTTTCCAAATCC   |

B-ACTIN

ACACAGGGGAGGTGATAGCATT

ATACATCTCAAGTTGGGGACAA

**Supplemental Table S2.**

qRT-PCR primers.
